# Supplementary material for: Precise determination of 204Pb-based isotopic ratios in environmental samples by quadrupole inductively coupled plasma mass spectrometry
Source: Royal Society of Chemistry journal article supplement (doi:10.1039/d2ja00424k), 2023-01-01
Supplement: d2ja00424k1.pdf [file d2ja00424k1.pdf]

## Precise determination of $^{204}\text{Pb}$ -based isotopic ratios in environmental samples by quadrupole inductively coupled plasma mass spectrometry

Marco Grotti\*, Maria Alessia Vecchio, Dalia Gobbato, Matilde Mataloni, Francisco Ardini

### *Supplementary information*

**Table S1.** Doehlert design for the multivariate optimization of the spray chamber temperature and the sample uptake rate

| Run | X <sub>1</sub> | X <sub>2</sub> | T (°C) | UR (μL/min) |
|-----|----------------|----------------|--------|-------------|
| 1   | 0              | 0              | 42     | 200         |
| 2   | 1              | 0              | 80     | 200         |
| 3   | 0.5            | 0.866          | 61     | 300         |
| 4   | -1             | 0              | 4      | 200         |
| 5   | -0.5           | -0.866         | 23     | 100         |
| 6   | 0.5            | -0.866         | 61     | 100         |
| 7   | -0.5           | 0.866          | 23     | 300         |

**Table S2.** Central composite design for the multivariate optimization of the quadrupoles' parameters

| Run | X <sub>1</sub> | X <sub>2</sub> | X <sub>3</sub> | CRO (V) | QRO (V) | CPV (V) |
|-----|----------------|----------------|----------------|---------|---------|---------|
| 1   | -1             | -1             | -1             | -14.9   | -7.0    | -23.2   |
| 2   | 1              | -1             | -1             | -1.1    | -7.0    | -23.2   |
| 3   | -1             | 1              | -1             | -14.9   | 1.0     | -23.2   |
| 4   | 1              | 1              | -1             | -1.1    | 1.0     | -23.2   |
| 5   | -1             | -1             | 1              | -14.9   | -7.0    | -4.8    |
| 6   | 1              | -1             | 1              | -1.1    | -7.0    | -4.8    |
| 7   | -1             | 1              | 1              | -14.9   | 1.0     | -4.8    |
| 8   | 1              | 1              | 1              | -1.1    | 1.0     | -4.8    |
| 9   | -1.73          | 0              | 0              | -20.0   | -3.0    | -14.0   |
| 10  | 1.73           | 0              | 0              | 4.0     | -3.0    | -14.0   |
| 11  | 0              | -1.73          | 0              | -8.0    | -10.0   | -14.0   |
| 12  | 0              | 1.73           | 0              | -8.0    | 4.0     | -14.0   |
| 13  | 0              | 0              | -1.73          | -8.0    | -3.0    | -30.0   |
| 14  | 0              | 0              | 1.73           | -8.0    | -3.0    | 2.0     |

|       |   |   |   |      |      |       |
|-------|---|---|---|------|------|-------|
| 15-20 | 0 | 0 | 0 | -8.0 | -3.0 | -14.0 |
|-------|---|---|---|------|------|-------|

**Table S3.** Models' coefficients and their significance (Central composite design)

| <b>Coefficient</b>       | <b>Sensitivity<br/>(Mcps ppm<sup>-1</sup>)</b> |                |
|--------------------------|------------------------------------------------|----------------|
|                          | <b>Value</b>                                   | <b>p-value</b> |
| b <sub>0</sub>           | 102.9                                          | <0.001         |
| b <sub>1</sub>           | 3.16                                           | 0.037          |
| b <sub>2</sub>           | -1.49                                          | 0.241          |
| b <sub>3</sub>           | 12.1                                           | <0.001         |
| b <sub>12</sub>          | -1.49                                          | 0.361          |
| b <sub>13</sub>          | -8.19                                          | 0.003          |
| b <sub>23</sub>          | 0.16                                           | 0.917          |
| b <sub>11</sub>          | -18.7                                          | <0.001         |
| b <sub>22</sub>          | -4.03                                          | 0.012          |
| b <sub>33</sub>          | -19.0                                          | <0.001         |
| <b>Model performance</b> |                                                |                |
| %EV <sup>(a)</sup>       | 82.0                                           |                |
| %CVEV <sup>(b)</sup>     | 34.7                                           |                |

Notes: <sup>(a)</sup> explained variance; <sup>(b)</sup> cross-validation explained variance

**Table S4.** Models' coefficients and their significance (Doehlert design)

| <b>Coefficient</b>       | <b>Sensitivity<br/>(Mcps ppm<sup>-1</sup>)</b> |                | <b>Oxides<br/>(CeO/Ce)</b> |                |
|--------------------------|------------------------------------------------|----------------|----------------------------|----------------|
|                          | <b>Value</b>                                   | <b>p-value</b> | <b>Value</b>               | <b>p-value</b> |
| b <sub>0</sub>           | 61.5                                           | <0.001         | 1.20                       | 0.23           |
| b <sub>1</sub>           | 5.39                                           | <0.001         | 3.23                       | <0.001         |
| b <sub>2</sub>           | 24.4                                           | <0.001         | 0.92                       | 0.12           |
| b <sub>12</sub>          | 0.87                                           | 0.38           | 1.10                       | 0.34           |
| b <sub>11</sub>          | 14.3                                           | <0.001         | 3.83                       | 0.01           |
| b <sub>22</sub>          | -6.33                                          | <0.001         | -0.68                      | 0.57           |
| <b>Model performance</b> |                                                |                |                            |                |
| %EV <sup>(a)</sup>       | 99.6                                           |                | 80.9                       |                |
| %CVEV <sup>(b)</sup>     | 99.3                                           |                | 68.0                       |                |

Notes: <sup>(a)</sup> explained variance; <sup>(b)</sup> cross-validation explained variance
